# Supplementary material
Source: PubMed Central journal article supplement (PMC58780)
Supplement: pnas_98_20_11627__1.pdf [file pnas_98_20_11627__1.pdf]

**Table 2. Protein families analysed in detail for  $\beta$ -binding motifs**

| Function            | Family                             | Protein                | Distribution                   | Location of PCNA/gp45 consensus binding motif       | Bacterial orthologue/ close homologue                 |
|---------------------|------------------------------------|------------------------|--------------------------------|-----------------------------------------------------|-------------------------------------------------------|
| Polymerases         | PolB                               | PolB                   | Archaea                        | Carboxyl terminus                                   | PolB                                                  |
|                     | PolB                               | PolB                   | Chlorella + Felmannia sp virus | Carboxyl terminus                                   | —                                                     |
|                     |                                    | gp43                   | Bacteriophage                  | Carboxyl terminus                                   | —                                                     |
|                     | PolC                               | —                      | Eukaryotes                     | Internal                                            | —                                                     |
|                     | UmuC/DinB                          | pol                    | Eukaryotes                     | Does not bind?                                      | DnaE<br>PolC<br>DinB1 (PolIV)<br>DinB2<br>UmuC (PolV) |
| Polymerase subunits | PolB                               | PolII                  | Archaea                        | Carboxyl-terminal large subunit                     | —                                                     |
|                     |                                    |                        | Eukaryotes                     | Carboxyl-terminal pol32/p66/cdc27 subunit           | —                                                     |
|                     | Flap endonuclease                  | FEN                    | Eukaryotes and archaea         | Carboxyl terminus                                   | Domain of PolI                                        |
|                     | Ligase                             | DNA Ligase I           | All                            | Amino-terminal eukaryotes                           | LigA                                                  |
| Repair components   | MutS1 family                       | MSH2                   | Eukaryotes                     | May not bind                                        | MutS1                                                 |
|                     |                                    | MSH3                   | Eukaryotes                     | Amino terminus                                      |                                                       |
|                     |                                    | MSH6                   | Eukaryotes                     | Amino terminus                                      |                                                       |
|                     | MutL family                        | MLH1                   | Eukaryotes                     | Not identified                                      | MutL                                                  |
|                     | MutY family                        | MYH                    | Higher eukaryotes              | Carboxyl terminus                                   | MutY                                                  |
|                     | Methyl-cytosine methyl transferase | mcmt                   | Eukaryotes/archaea             | Internal in vertebrates<br>not identified in others | Various                                               |
|                     | Uracil DNA glycosylase             | UNG2 - nuclear isoform | Eukaryotes                     | Amino terminus                                      | Ung                                                   |
|                     | 5'-3' Endonucleases                | XPG                    | Eukaryotes                     | Internal                                            | Domain of PolI                                        |
|                     | Various                            | Eukaryotes             | Internal                       | Domain of PolI                                      |                                                       |

| Function               | Family                                                | Protein                           | Distribution                        | Location of PCNA/gp45 consensus binding motif | Bacterial orthologue/ close homologue |   |
|------------------------|-------------------------------------------------------|-----------------------------------|-------------------------------------|-----------------------------------------------|---------------------------------------|---|
| Clamp loading proteins | RFC1/RFC53/Rad17                                      | RFC1                              | Eukaryotes                          | Amino terminus, other not identified          | —                                     |   |
|                        |                                                       | RFC53                             | Archaea                             | Carboxyl terminus                             | —                                     |   |
|                        | RFC2-5<br>gp62                                        | Rad17                             | Eukaryotes                          | Not identified                                | —                                     |   |
|                        |                                                       | RFC2-5<br>gp62                    | Eukaryotes/archaea<br>Bacteriophage | Not identified<br>Not identified              | —<br>—                                |   |
| Others                 | Ribosomal protein homologue                           | GADD45/M yD118                    | Higher eukaryotes                   | Another site                                  | —                                     |   |
|                        | Transcriptional coactivator                           | gp33                              | Bacteriophage T4                    | Carboxyl terminus                             | —                                     |   |
|                        | -family                                               | gp55                              | Bacteriophage T4                    | Carboxyl terminus                             | —                                     |   |
|                        | Cyclin                                                | Cyclin D                          | Eukaryotes                          | Not identified                                | —                                     |   |
|                        | Cyclin-dependent kinase                               | Cdk2                              | Eukaryotes                          | Not identified                                | —                                     |   |
|                        | Cyclin-dependent kinase inhibitors                    | p21/WAF1/<br>CIP1/Sdi1/D<br>acapo | p21/WAF1/<br>CIP1/Sdi1/D            | Eukaryotes                                    | Carboxyl terminus                     | — |
|                        |                                                       |                                   | p57                                 | Eukaryotes                                    | Carboxyl terminus                     | — |
|                        | Deacetylases                                          | Histone deacetylases              | Eukaryotes                          | Not identified                                | —                                     |   |
|                        | Chromatin assembly                                    | CAF1 - p150                       | Eukaryotes                          | Another site                                  | —                                     |   |
|                        | Polarity factor                                       | Cdc24                             | <i>Schizosaccharomyces pombe</i>    | Internal?                                     | —                                     |   |
|                        | Transposases                                          | Pogo/Tigger                       | Eukaryotes                          | Carboxyl terminus                             | —                                     |   |
|                        | HLA/MHC                                               |                                   | Vertebrates?                        | Another site                                  | —                                     |   |
|                        | Virulence factor                                      | ICP34.5                           | Herpes viruses                      | Another site                                  | —                                     |   |
|                        | Myeloid differentiation /growth arrest and DNA damage | GADD43/M yd116                    | GADD43/M yd116                      | Higher eukaryotes                             | Another site                          | — |
| hcdc18                 |                                                       |                                   | Eukaryotes                          | Not identified                                | —                                     |   |
