# Supplementary material
Source: PubMed Central journal article supplement (PMC58780)
Supplement: pnas_98_20_11627__2.pdf [file pnas_98_20_11627__2.pdf]

Supporting information for Dalrymple *et al.* (2001) *Proc. Natl. Acad. Sci. USA* **98** (20), 11627–11632. (10.1073/pnas.191384398)

**Table 3. Sources of sequences**

|                   |                                                                                                                                                                                                                                                                                                                                                                                                                                                                                                                                                                                                                                                                                                                                                                                                                                                                                                                                                                                                                                                      |
|-------------------|------------------------------------------------------------------------------------------------------------------------------------------------------------------------------------------------------------------------------------------------------------------------------------------------------------------------------------------------------------------------------------------------------------------------------------------------------------------------------------------------------------------------------------------------------------------------------------------------------------------------------------------------------------------------------------------------------------------------------------------------------------------------------------------------------------------------------------------------------------------------------------------------------------------------------------------------------------------------------------------------------------------------------------------------------|
| PolB - archaea    | <i>Methanococcus jannaschii</i> (gi:2127863), <i>M. thermoautotrophicum</i> (gi:7482292), <i>Halobacterium</i> sp. NRC-1 (gi:10580123), <i>Archaeoglobus fulgidus</i> (gi:7434809), <i>Aeropyrum pernix</i> ( gi:6225286), <i>Pyrococcus abyssi</i> (gi:1655695)                                                                                                                                                                                                                                                                                                                                                                                                                                                                                                                                                                                                                                                                                                                                                                                     |
| PolB - eubacteria | <i>Pseudomonas aeruginosa</i> (gi:9947877), <i>Vibrio cholerae</i> (gi:9655692), <i>Escherichia coli</i> (gi:1786246)                                                                                                                                                                                                                                                                                                                                                                                                                                                                                                                                                                                                                                                                                                                                                                                                                                                                                                                                |
| PolC              | <i>Thermotoga maritima</i> (gi:4981093), <i>Bacillus halodurans</i> (gi:10175038), <i>Bacillus subtilis</i> (gi:2634030), <i>Ureaplasma urealyticum</i> (gi:6899360), <i>Mycoplasma pneumoniae</i> (gi:1673778), <i>Mycoplasma genitalium</i> (gi:3844641)                                                                                                                                                                                                                                                                                                                                                                                                                                                                                                                                                                                                                                                                                                                                                                                           |
| DnaE1             | <i>Aquifex aeolicus</i> (gi: 2983510), <i>Thermotoga. maritima</i> (gi:4980970), <i>Deinococcus radiodurans</i> (gi: 6458195), <i>Chlamydophila pneumoniae</i> (gi: 4376966), <i>Chlamydia trachomatis</i> (gi: 3328984), <i>Synechocystis</i> sp. (gi:1653960), <i>Treponema pallidum</i> (gi:3322971), <i>Borrelia burgdorferi</i> (gi:2688500), <i>Rickettsia prowazekii</i> (gi:3861305), <i>Neisseria meningitidis</i> (gi:7227081), <i>Xylella fastidiosa</i> (gi:9105008), <i>Pseudomonas aeruginosa</i> (gi: 9949800), <i>Vibrio cholerae</i> (gi:1706494), <i>Haemophilus influenzae</i> (gi:1573746), <i>Buchnera</i> sp. APS (gi:10038918), <i>Escherichia coli</i> (gi:1786381), <i>Helicobacter pylori</i> (gi: 2314638), <i>Campylobacter jejuni</i> (gi:6968175), <i>Mycobacterium tuberculosis</i> , (gi:1403495), <i>Bacillus halodurans</i> (gi:10175791), <i>Bacillus subtilis</i> (gi:2635388), <i>Ureaplasma urealyticum</i> (gi:6899403), <i>Mycoplasma pneumoniae</i> (gi:1674148), <i>Mycoplasma genitalium</i> (gi:1045954) |

|       |                                                                                                                                                                                                                                                                                                                                                                                                                                                                                                                                                                                                                                                                                                                                                |
|-------|------------------------------------------------------------------------------------------------------------------------------------------------------------------------------------------------------------------------------------------------------------------------------------------------------------------------------------------------------------------------------------------------------------------------------------------------------------------------------------------------------------------------------------------------------------------------------------------------------------------------------------------------------------------------------------------------------------------------------------------------|
| DinB1 | <i>Neisseria meningitidis</i> (gi: 6900413), <i>Pseudomonas aeruginosa</i> (gi:9946826), <i>Vibrio cholerae</i> (gi: 9656851), <i>Haemophilus influenzae</i> (gi:3212232), <i>Escherichia coli</i> (gi:2501652), <i>Mycobacterium tuberculosis</i> DinX (gi:1403505), <i>Bacillus halodurans</i> (gi:10175362), <i>Bacillus subtilis</i> YqjW (gi:2634806), <i>Bacillus halodurans</i> (gi:10174089), <i>Bacillus subtilis</i> YqjH (gi: 1731071), <i>Ureaplasma urealyticum</i> (gi: 6899428), <i>Mycoplasma pneumoniae</i> (gi:2501651) <i>Mycoplasma genitalium</i> (gi:2501650)                                                                                                                                                            |
| UmuC  | <i>Pseudomonas syringae</i> (RulB gi:1399356), <i>Escherichia coli</i> (UmuC gi:1787432, MucB gi:216828)                                                                                                                                                                                                                                                                                                                                                                                                                                                                                                                                                                                                                                       |
| MutS1 | <i>Aquifex aeolicus</i> (Aa, gi:2983001), <i>Thermotoga maritima</i> (Tm, gi:4982296), <i>Chlamydia pneumoniae</i> (Cp, gi:8979315), <i>Chlamydia trachomatis</i> (Ct, gi:3329257), <i>Synechocystis</i> sp. (S, gi:1652903), <i>Treponema pallidum</i> (Tp, gi:3322604), <i>Borrelia burgdorferi</i> (Bb, gi:2688751), <i>Rickettsia prowazekii</i> (Rp, gi:3860859), <i>Neisseria meningitidis</i> (Nm, gi:7379009), <i>Xylella fastidiosa</i> (Xf, gi:9106782), <i>Pseudomonas aeruginosa</i> (Pa, gi:9949778), <i>Vibrio cholerae</i> (Vc, gi: 9654962), <i>Haemophilus influenzae</i> (Hi, gi:1573708), <i>Escherichia coli</i> (Ec, gi:1789089), <i>Bacillus halodurans</i> (Bh, gi:10174989), <i>Bacillus subtilis</i> (Bs, gi:2634076) |
